# Supplementary material for: Modular and Molecular Optimization of a LOV (Light–Oxygen–Voltage)-Based Optogenetic Switch in Yeast
Source: MDPI journal article supplement (doi:10.3390/ijms22168538), 2021-08-09
Supplement: s1 [file s1]

## **Supplementary Information**

### **Modular and molecular optimization of a LOV (Light-Oxygen and Voltage) based optogenetic switch in yeast**

Andres Romero<sup>1,2,3</sup>, Vicente Rojas<sup>1,2</sup>, Francisco Salinas<sup>2,3</sup>, Luis F. Larrondo<sup>1,2\*</sup>

1. Departamento de Genética Molecular y Microbiología, Facultad de Ciencias Biológicas, Pontificia Universidad Católica de Chile, Santiago, Chile.

2. ANID – Millennium Science Initiative – Millennium Institute for Integrative Biology (iBIO), Santiago, Chile.

3. Instituto de Bioquímica y Microbiología, Facultad de Ciencias, Universidad Austral de Chile, Valdivia, Chile.

\*Corresponding author email: [llarrondo@bio.puc.cl](mailto:llarrondo@bio.puc.cl)

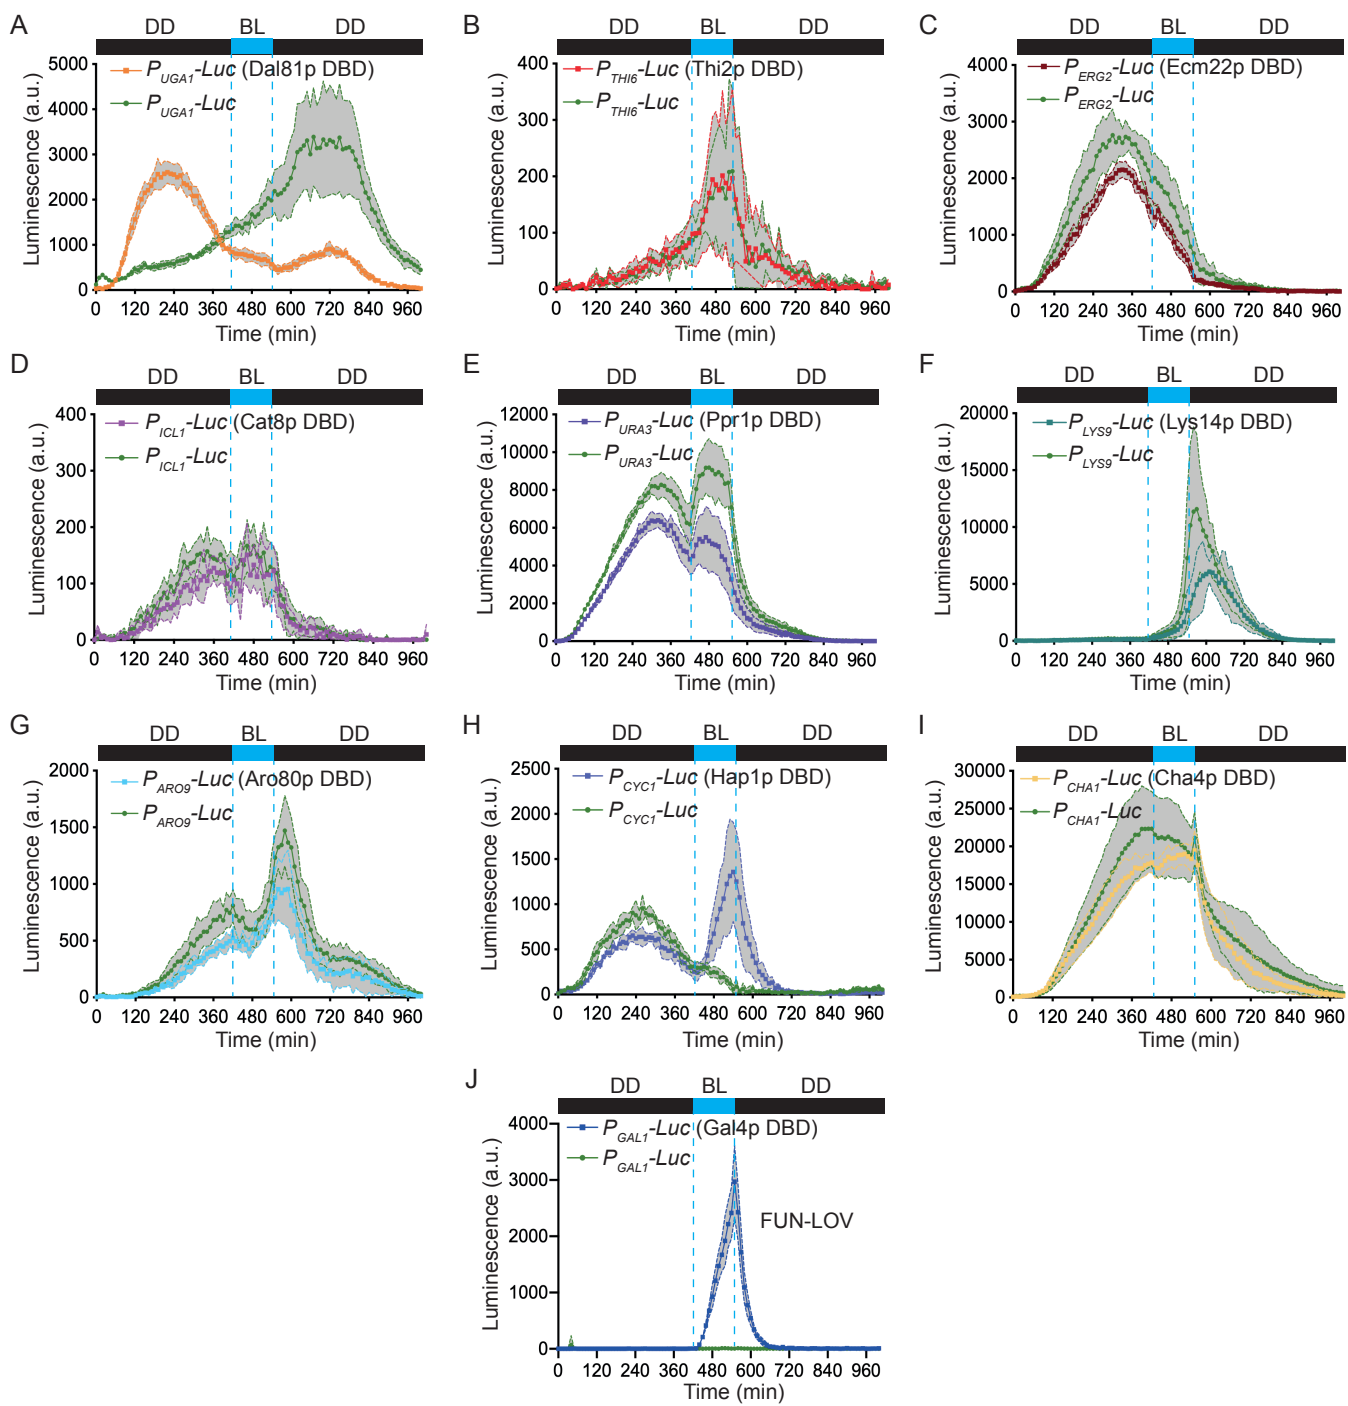

**Supplementary Figure S1.** Raw luciferase expression for the yeast strains carrying the FUN-LOV switch variants with different DNA-binding domains (DBD). (A) Dal80p DBD. (B) Thi2p DBD. (C) Ecm22p DBD. (D) Cat8p DBD. (E) Ppr1p DBD. (F) Lys14p DBD. (G) Aro9p DBD. (H) Hap1p DBD. (I) Cha4p DBD. (J) Gal4p DBD present in the FUN-LOV switch. In all the panels, the target promoter region recognized by each DBD is controlling the luciferase (*Luc*) expression and it was used as a control. The yeast strains were subjected to a blue-light (BL) pulse of 120 minutes indicated with blue dashed lines. The graphs show the average of six biological replicates with the standard deviation represented as shaded region. DD: constant darkness.

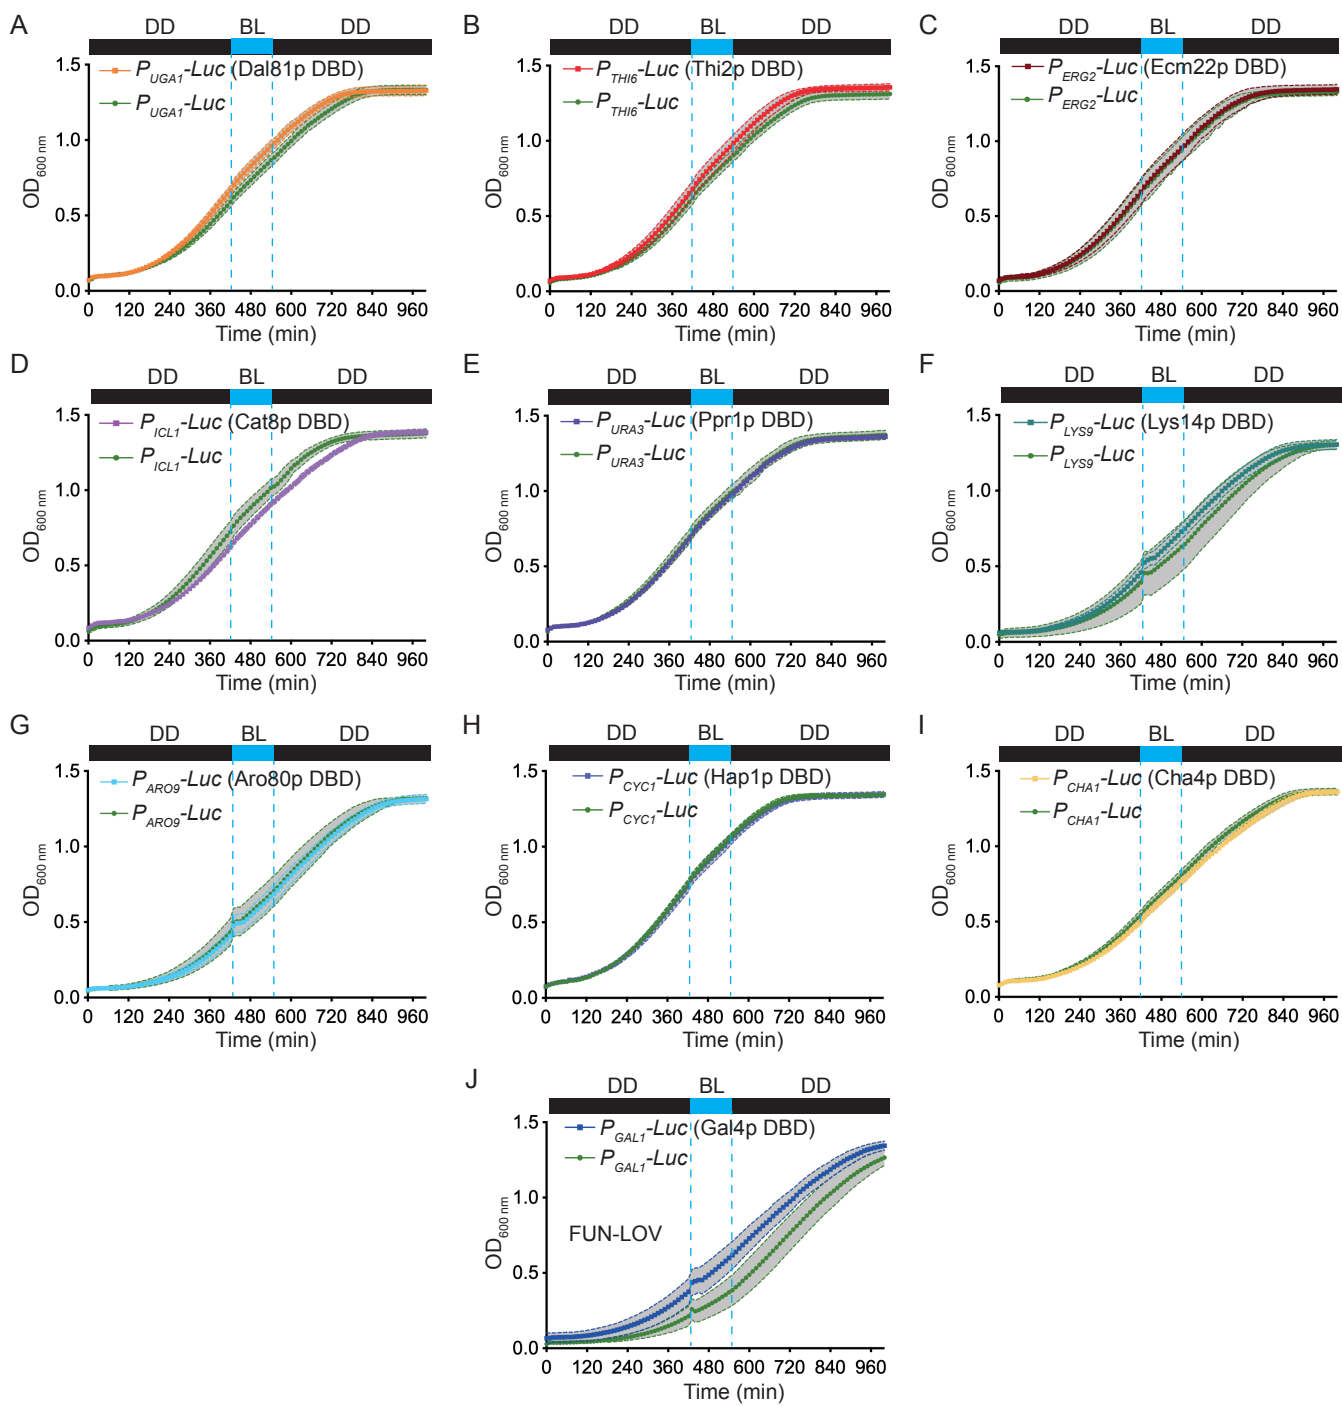

**Supplementary Figure S2.** Growth curves for the yeast strains carrying the FUN-LOV switch variants with different DNA-binding domains (DBD). (A) Dal80p DBD. (B) Thi2p DBD. (C) Ecm22p DBD. (D) Cat8p DBD. (E) Ppr1p DBD. (F) Lys14p DBD. (G) Aro9p DBD. (H) Hap1p DBD. (I) Cha4p DBD. (J) Gal4p DBD present in the FUN-LOV switch. The panels correspond to the same set of strains displayed in the Supplementary Figure S1. The yeast strains were subjected to a blue light (BL) pulse of 120 minutes indicated with blue dashed lines. The graphs show the average of six biological replicates with the standard deviation represented as shaded region. DD: constant darkness.

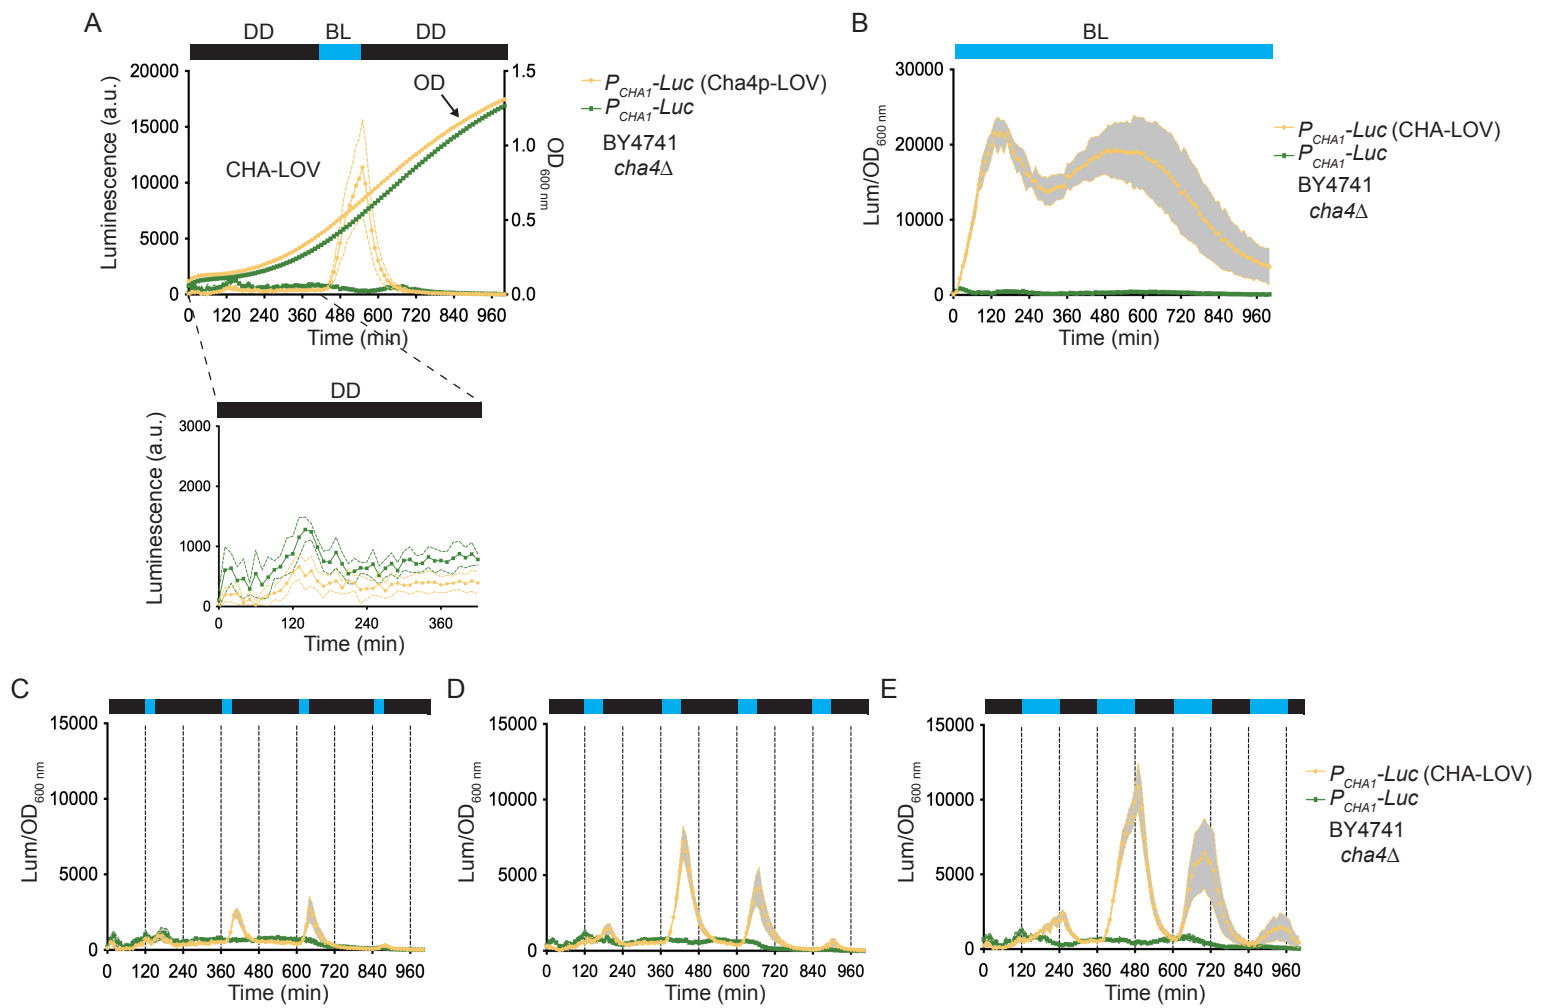

**Supplementary Figure S3.** Light response of the CHA4-LOV optogenetic switch in a *cha4Δ* yeast strain. (A) Raw luciferase expression activated by the CHA-LOV optogenetic switch upon a single 2 hours blue-light pulse. The OD (optical density) at 600 nm of each strain is shown on the right Y-axis. (B) Normalized luciferase expression for the CHA-LOV switch under constant blue-light condition. The yeast strain carrying the CHA-LOV switch was subjected to blue-light pulses of 30 minutes (C), 60 minutes (D), or 120 minutes (E) every 4 hours. The yeast strain carrying the *CHA1* ( $P_{CHA1}$ ) promoter controlling the luciferase (*Luc*) expression was used as a control. In panel A, the average of raw luminescence and OD in six biological replicates is shown with the standard deviation (SD) represented as regions between dashed lines. The graphs in panels B, C, D, and E show the average of normalized luciferase expression in six biological replicates with the SD represented as shaded region. Abbreviations: DD, constant darkness; BL, blue-light; a.u., arbitrary units of luminescence.

A

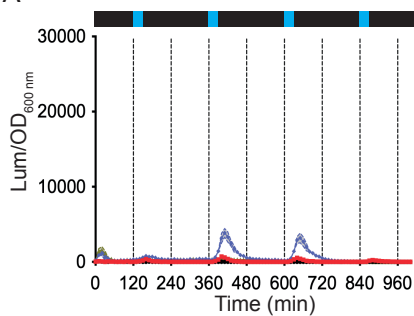

B

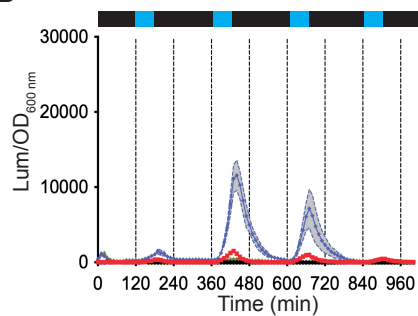

C

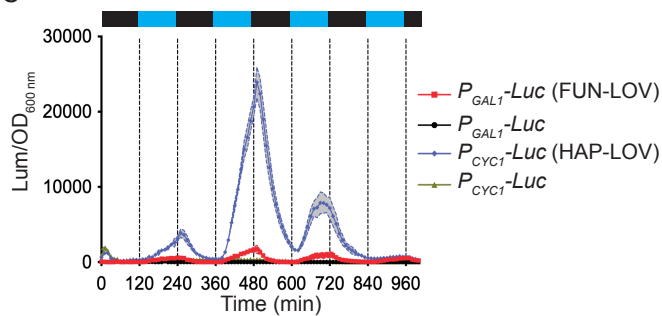

**Supplementary Figure S4.** Normalized luciferase expression activated by the FUN-LOV and HAP-LOV systems under blue-light pulses of different lengths. The yeast strains were subjected to blue-light pulses of 30 minutes (A), 60 minutes (B), or 120 minutes (C) every 4 hours. The yeast strains carrying the *GAL1* ( $P_{GAL1}$ ) or *CYC1* ( $P_{CYC1}$ ) promoters controlling the luciferase (*Luc*) expression were used as a control. The graphs show the average of normalized bioluminescence in six biological replicates with the standard deviation represented as shaded region.

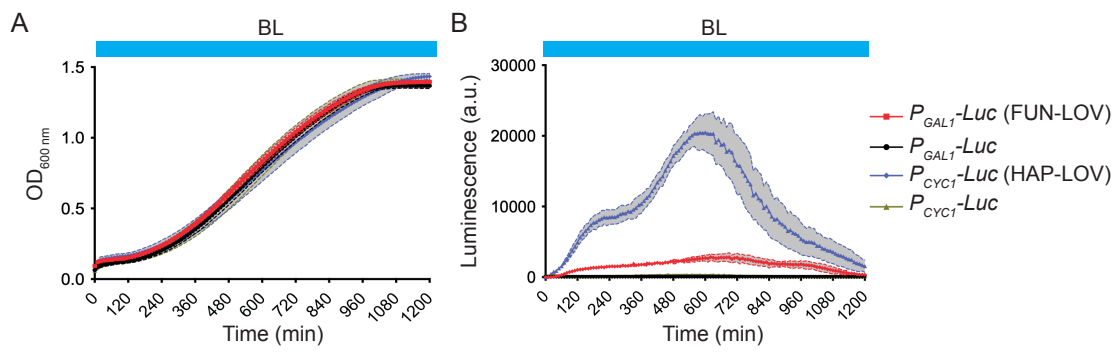

**Supplementary Figure S5.** Raw data for the FUN-LOV and HAP-LOV systems under constant blue-light (BL) illumination. Optical Density (OD) at 600 nm (A) and Luminescence (B). The yeast strains carrying the *GAL1* ( $P_{GAL1}$ ) or *CYC1* ( $P_{CYC1}$ ) promoters controlling the luciferase (*Luc*) expression were used as a control. The graphs show the average of six biological replicates with the standard deviation represented as shaded region. (a.u.): arbitrary units of luminescence.

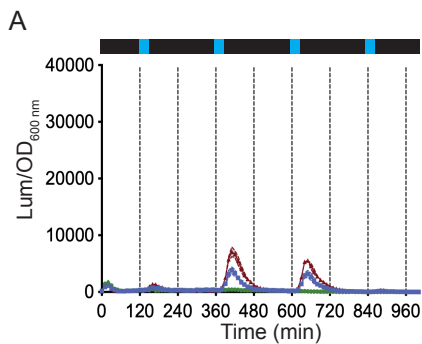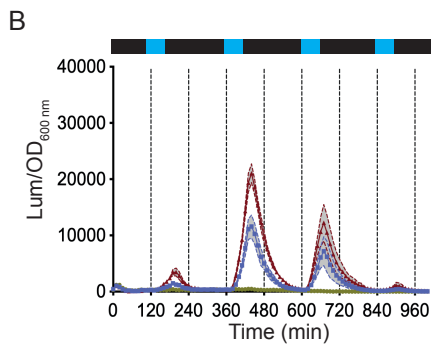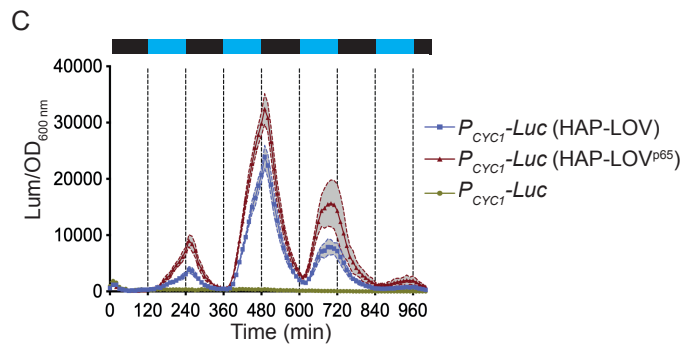

**Supplementary Figure S6.** Normalized luciferase expression activated by the HAP-LOV and HAP-LOV<sup>p65</sup> systems under blue-light pulses of different lengths. The yeast strains were subjected to blue-light pulses of 30 minutes (A), 60 minutes (B), or 120 minutes (C) every 4 hours. The yeast strain carrying the *CYC1* ( $P_{CYC1}$ ) promoter controlling the luciferase (*Luc*) expression was used as a control. The graphs show the average of normalized bioluminescence in six biological replicates with the standard deviation represented as shaded region.

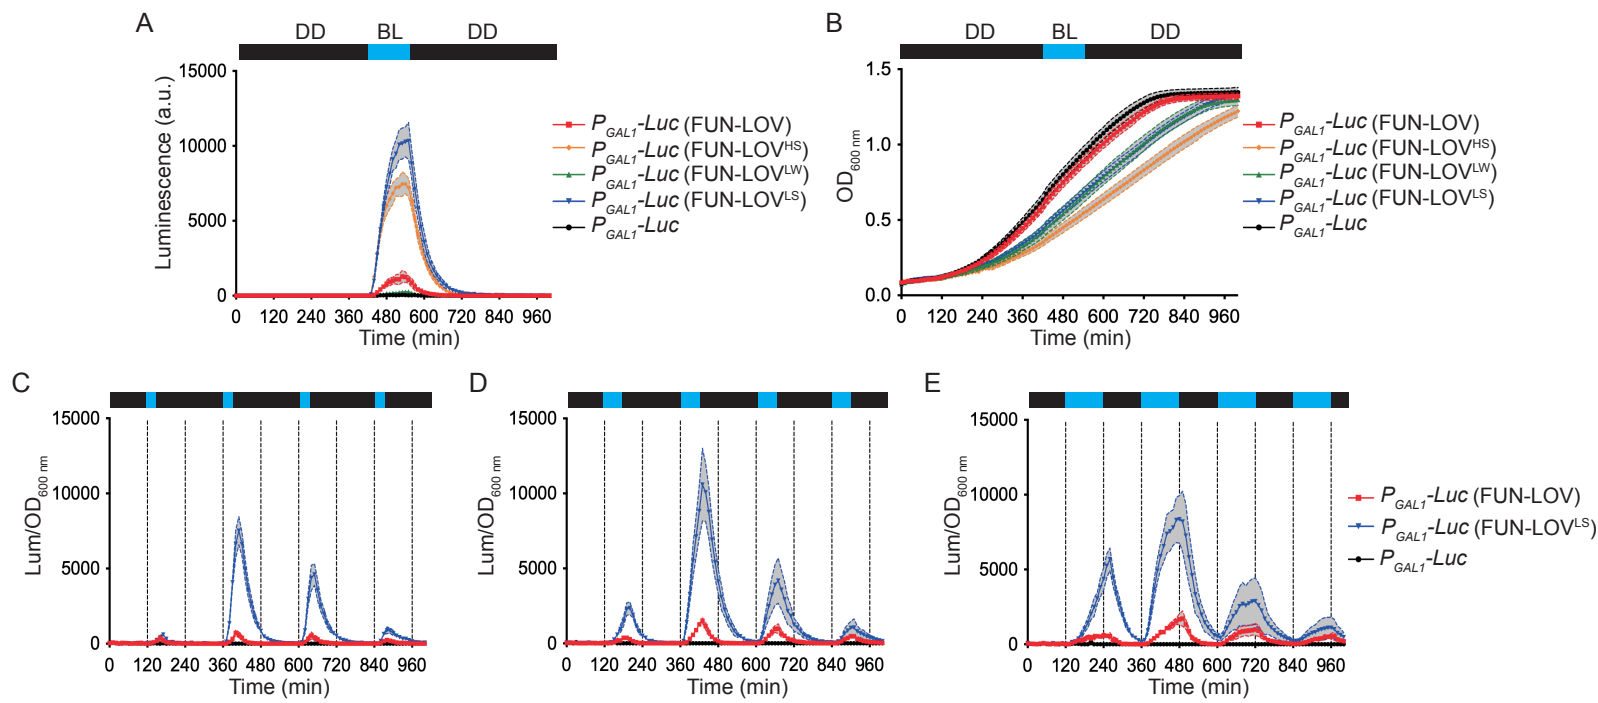

**Supplementary Figure S7.** Molecular optimization of the promoter strength and plasmid copy number in the FUN-LOV switch. (A) Raw luciferase expression activated by different FUN-LOV variants. (B) Growth curves for different FUN-LOV variants. The yeast strains carrying the FUN-LOV and FUN-LOV<sup>LS</sup> systems were subjected to blue-light pulses of different duration: 30 minutes (C), 60 minutes (D), or 120 minutes (E) every 4 hours. The yeast strain carrying the *GAL1* ( $P_{GAL1}$ ) promoter controlling the luciferase (*Luc*) expression was used as a control. The graphs in panels C, D, and E shows the average of normalized luciferase expression in six biological replicates with the standard deviation represented as shaded region. Abbreviations: DD, constant darkness; BL, blue-light; H, high copy plasmid; L, low copy plasmid; S, strong promoter; W, weak promoter; a.u., arbitrary units of luminescence.

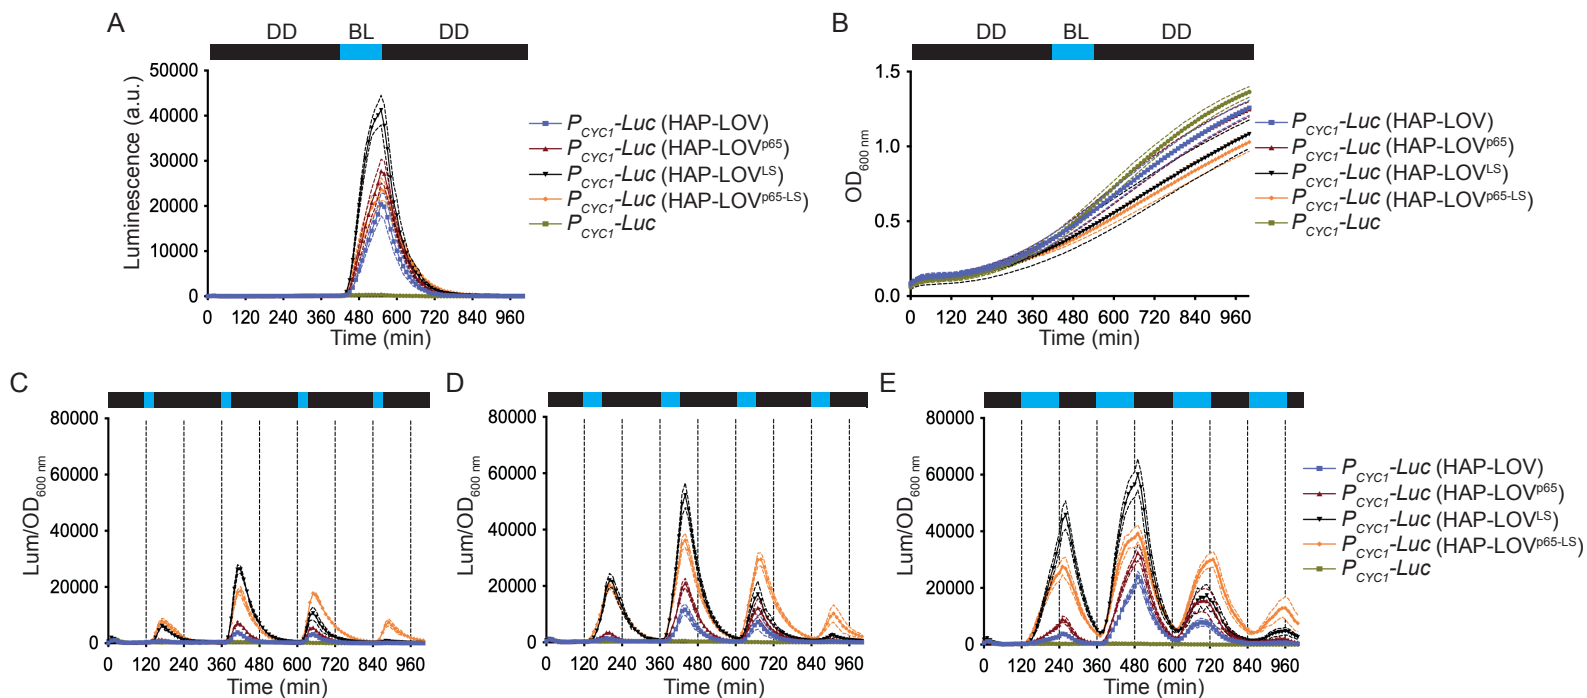

**Supplementary Figure S8.** Molecular optimization of the promoter strength and plasmid copy number in the HAP-LOV switch. (A) Raw luciferase expression activated by different HAP-LOV variants. (B) Growth curves for different HAP-LOV variants. The yeast strains carrying different version of the HAP-LOV switch were subjected to blue-light pulses of different duration: 30 minutes (C), 60 minutes (D), or 120 minutes (E) every 4 hours. The yeast strain carrying the *CYC1* ( $P_{CYC1}$ ) promoter controlling the luciferase (*Luc*) expression was used as a control. The graphs in panels C, D, and E shows the average of normalized luciferase expression in six biological replicates with the standard deviation represented as shaded region. Abbreviations: DD, constant darkness; BL, blue-light; L, low copy plasmid; S, strong promoter; a.u., arbitrary units of luminescence.

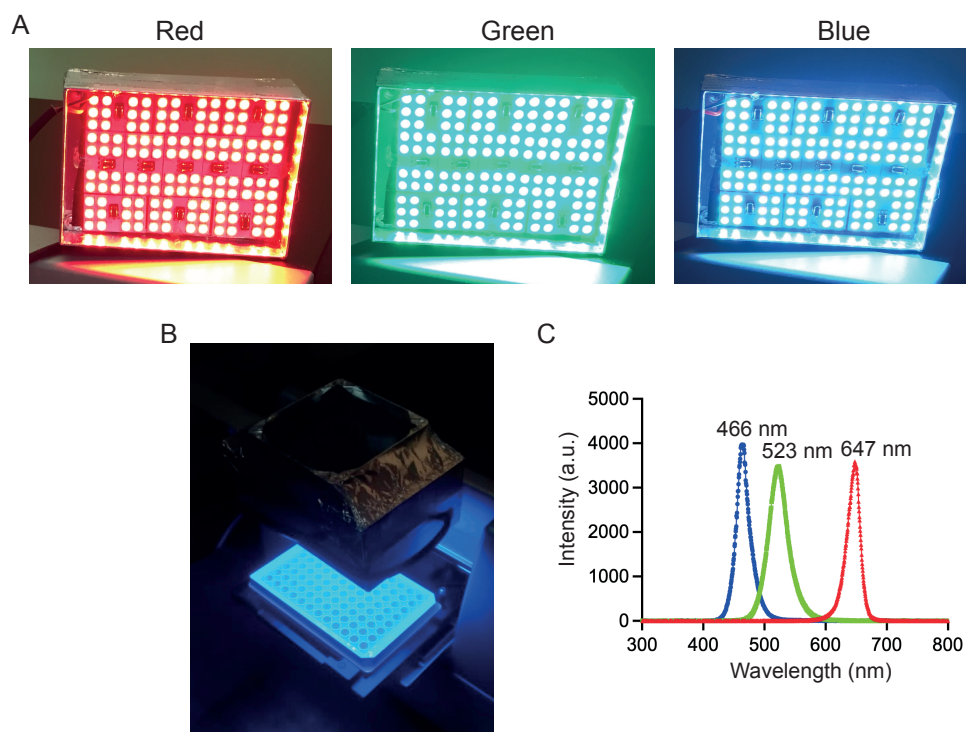

**Supplementary Figure S9.** Illumination system used in our experiments. (A) LED RGB panel developed in this work and enabling illumination with red, green, and blue lights. (B) 96-well plate under blue-light illumination using the LED panel. (C) Emission spectrum of the LED lights composing the panel.

**Supplementary Table S1.** Statistical comparison among optogenetic systems for the maximal normalized luciferase expression data set. One-way ANOVA and Turkey's multiple comparisons tests were used in the statistical analysis.

| Tukey's multiple comparisons test                     | Mean Diff. | 95.00% CI of diff. | Below threshold? | Summary | Adjusted P Value |
|-------------------------------------------------------|------------|--------------------|------------------|---------|------------------|
| FUN-LOV vs. FUN-LOV <sup>VP16</sup>                   | 645.5      | -5910 to 7201      | No               | ns      | >0.9999          |
| FUN-LOV vs. FUN-LOV <sup>p65</sup>                    | 37.18      | -6518 to 6593      | No               | ns      | >0.9999          |
| FUN-LOV vs. FUN-LOV <sup>LS</sup>                     | -14316     | -20872 to -7760    | Yes              | ****    | <0.0001          |
| FUN-LOV vs. HAP-LOV                                   | -26870     | -33426 to -20314   | Yes              | ****    | <0.0001          |
| FUN-LOV vs. HAP-LOV <sup>VP16</sup>                   | -18195     | -24750 to -11639   | Yes              | ****    | <0.0001          |
| FUN-LOV vs. HAP-LOV <sup>p65</sup>                    | -37629     | -44184 to -31073   | Yes              | ****    | <0.0001          |
| FUN-LOV vs. HAP-LOV <sup>p65-LS</sup>                 | -46333     | -52888 to -39777   | Yes              | ****    | <0.0001          |
| FUN-LOV vs. HAP-LOV <sup>LS</sup>                     | -61686     | -68242 to -55130   | Yes              | ****    | <0.0001          |
| FUN-LOV <sup>VP16</sup> vs. FUN-LOV <sup>p65</sup>    | -608.3     | -7164 to 5947      | No               | ns      | >0.9999          |
| FUN-LOV <sup>VP16</sup> vs. FUN-LOV <sup>LS</sup>     | -14961     | -21517 to -8406    | Yes              | ****    | <0.0001          |
| FUN-LOV <sup>VP16</sup> vs. HAP-LOV                   | -27516     | -34071 to -20960   | Yes              | ****    | <0.0001          |
| FUN-LOV <sup>VP16</sup> vs. HAP-LOV <sup>VP16</sup>   | -18840     | -25396 to -12284   | Yes              | ****    | <0.0001          |
| FUN-LOV <sup>VP16</sup> vs. HAP-LOV <sup>p65</sup>    | -38274     | -44830 to -31718   | Yes              | ****    | <0.0001          |
| FUN-LOV <sup>VP16</sup> vs. HAP-LOV <sup>p65-LS</sup> | -46978     | -53534 to -40423   | Yes              | ****    | <0.0001          |
| FUN-LOV <sup>VP16</sup> vs. HAP-LOV <sup>LS</sup>     | -62331     | -68887 to -55776   | Yes              | ****    | <0.0001          |
| FUN-LOV <sup>p65</sup> vs. FUN-LOV <sup>LS</sup>      | -14353     | -20909 to -7797    | Yes              | ****    | <0.0001          |
| FUN-LOV <sup>p65</sup> vs. HAP-LOV                    | -26907     | -33463 to -20352   | Yes              | ****    | <0.0001          |
| FUN-LOV <sup>p65</sup> vs. HAP-LOV <sup>VP16</sup>    | -18232     | -24787 to -11676   | Yes              | ****    | <0.0001          |
| FUN-LOV <sup>p65</sup> vs. HAP-LOV <sup>p65</sup>     | -37666     | -44221 to -31110   | Yes              | ****    | <0.0001          |
| FUN-LOV <sup>p65</sup> vs. HAP-LOV <sup>p65-LS</sup>  | -46370     | -52926 to -39814   | Yes              | ****    | <0.0001          |
| FUN-LOV <sup>p65</sup> vs. HAP-LOV <sup>LS</sup>      | -61723     | -68279 to -55167   | Yes              | ****    | <0.0001          |
| FUN-LOV <sup>LS</sup> vs. HAP-LOV                     | -12554     | -19110 to -5999    | Yes              | ****    | <0.0001          |
| FUN-LOV <sup>LS</sup> vs. HAP-LOV <sup>VP16</sup>     | -3879      | -10434 to 2677     | No               | ns      | 0.5994           |
| FUN-LOV <sup>LS</sup> vs. HAP-LOV <sup>p65</sup>      | -23313     | -29868 to -16757   | Yes              | ****    | <0.0001          |
| FUN-LOV <sup>LS</sup> vs. HAP-LOV <sup>p65-LS</sup>   | -32017     | -38573 to -25461   | Yes              | ****    | <0.0001          |
| FUN-LOV <sup>LS</sup> vs. HAP-LOV <sup>LS</sup>       | -47370     | -53926 to -40814   | Yes              | ****    | <0.0001          |
| HAP-LOV vs. HAP-LOV <sup>VP16</sup>                   | 8675       | 2120 to 15231      | Yes              | **      | 0.0026           |
| HAP-LOV vs. HAP-LOV <sup>p65</sup>                    | -10759     | -17314 to -4203    | Yes              | ****    | <0.0001          |
| HAP-LOV vs. HAP-LOV <sup>p65-LS</sup>                 | -19463     | -26018 to -12907   | Yes              | ****    | <0.0001          |
| HAP-LOV vs. HAP-LOV <sup>LS</sup>                     | -34816     | -41371 to -28260   | Yes              | ****    | <0.0001          |

|                                                       |        |                  |     |      |         |
|-------------------------------------------------------|--------|------------------|-----|------|---------|
| HAP-LOV <sup>VP16</sup> vs. HAP-LOV <sup>p65</sup>    | -19434 | -25990 to -12878 | Yes | **** | <0.0001 |
| HAP-LOV <sup>VP16</sup> vs. HAP-LOV <sup>p65-LS</sup> | -28138 | -34694 to -21582 | Yes | **** | <0.0001 |
| HAP-LOV <sup>VP16</sup> vs. HAP-LOV <sup>LS</sup>     | -43491 | -50047 to -36936 | Yes | **** | <0.0001 |
| HAP-LOV <sup>p65</sup> vs. HAP-LOV <sup>p65-LS</sup>  | -8704  | -15260 to -2148  | Yes | **   | 0.0025  |
| HAP-LOV <sup>p65</sup> vs. HAP-LOV <sup>LS</sup>      | -24057 | -30613 to -17502 | Yes | **** | <0.0001 |
| HAP-LOV <sup>p65-LS</sup> vs. HAP-LOV <sup>LS</sup>   | -15353 | -21909 to -8797  | Yes | **** | <0.0001 |

ns: no significance.

**Supplementary Table S2.** Fold-induction achieved by the optogenetic systems upon a blue Blue-Light (BL) pulse and measured as luciferase expression.

| System                    | Average raw luminescence in BL (a.u.) | Time of maximal luminescence (min) | Average raw luminescence in DD (a.u.)* | Fold induction (BL/DD)** |
|---------------------------|---------------------------------------|------------------------------------|----------------------------------------|--------------------------|
| HAP-LOV <sup>LS</sup>     | 41236.5 ± 3293.1                      | 550                                | 60 ± 44.2                              | 686.7 ± 54.8             |
| HAP-LOV <sup>P65-LS</sup> | 23696.3 ± 2554.1                      | 550                                | 35.4 ± 27.1                            | 669.2 ± 72.1             |
| HAP-LOV <sup>P65</sup>    | 27724.7 ± 2627                        | 550                                | 54.9 ± 39.5                            | 504.7 ± 47.8             |
| HAP-LOV <sup>VP16</sup>   | 16115.0 ± 1026.7                      | 550                                | 105 ± 58.6                             | 153.5 ± 9.8              |
| HAP-LOV                   | 20366.8 ± 2556                        | 550                                | 66.2 ± 42.3                            | 307.4 ± 38.6             |
| FUN-LOV <sup>LS</sup>     | 10326.7 ± 1246                        | 550                                | 3.6 ± 5.3                              | 2870.7 ± 346.4           |
| FUN-LOV <sup>P65</sup>    | 1362.2 ± 492                          | 540                                | 2.6 ± 4.2                              | 520.1 ± 187.9            |
| FUN-LOV <sup>VP16</sup>   | 824.5 ± 327.1                         | 540                                | 2.7 ± 4.3                              | 301.1 ± 119.5            |
| FUN-LOV                   | 1282.5 ± 402.6                        | 530                                | 2.9 ± 4.5                              | 438.7 ± 137.7            |

DD: constant darkness.

a.u.: arbitrary units of luminescence.

\* Average raw luminescence measured in darkness condition previous to the blue-light pulse.

\*\* One-way ANOVA and Tukey's multiple comparisons test for this data set is shown in Supplementary Table S3.

**Supplementary Table S3.** Statistical comparison among optogenetic systems for the luciferase fold-induction data set. One-way ANOVA and Turkey's multiple comparisons tests were used in the statistical analysis. The fold-induction was calculated for each optogenetic system dividing the maximal peak of luciferase expression upon a blue-light pulse by the average luciferase expression in darkness condition.

| Tukey's multiple comparisons test                     | Mean Diff. | 95.00% CI of diff. | Below threshold? | Summary | Adjusted P Value |
|-------------------------------------------------------|------------|--------------------|------------------|---------|------------------|
| FUN-LOV vs. FUN-LOV <sup>VP16</sup>                   | 137.6      | -143.1 to 418.4    | No               | ns      | 0.8016           |
| FUN-LOV vs. FUN-LOV <sup>p65</sup>                    | -81.37     | -362.1 to 199.4    | No               | ns      | 0.9889           |
| FUN-LOV vs. FUN-LOV <sup>LS</sup>                     | -2432      | -2713 to -2151     | Yes              | ****    | <0.0001          |
| FUN-LOV vs. HAP-LOV                                   | 131.3      | -149.4 to 412.0    | No               | ns      | 0.8386           |
| FUN-LOV vs. HAP-LOV <sup>VP16</sup>                   | 285.2      | 4.463 to 565.9     | Yes              | *       | 0.0439           |
| FUN-LOV vs. HAP-LOV <sup>p65</sup>                    | -65.99     | -346.7 to 214.8    | No               | ns      | 0.9973           |
| FUN-LOV vs. HAP-LOV <sup>p65-LS</sup>                 | -230.5     | -511.2 to 50.27    | No               | ns      | 0.1864           |
| FUN-LOV vs. HAP-LOV <sup>LS</sup>                     | -248.0     | -528.7 to 32.75    | No               | ns      | 0.1219           |
| FUN-LOV <sup>VP16</sup> vs. FUN-LOV <sup>p65</sup>    | -219.0     | -499.7 to 61.76    | No               | ns      | 0.2408           |
| FUN-LOV <sup>VP16</sup> vs. FUN-LOV <sup>LS</sup>     | -2570      | -2850 to -2289     | Yes              | ****    | <0.0001          |
| FUN-LOV <sup>VP16</sup> vs. HAP-LOV                   | -6.308     | -287.1 to 274.4    | No               | ns      | >0.9999          |
| FUN-LOV <sup>VP16</sup> vs. HAP-LOV <sup>VP16</sup>   | 147.6      | -133.1 to 428.3    | No               | ns      | 0.7359           |
| FUN-LOV <sup>VP16</sup> vs. HAP-LOV <sup>p65</sup>    | -203.6     | -484.3 to 77.14    | No               | ns      | 0.3290           |
| FUN-LOV <sup>VP16</sup> vs. HAP-LOV <sup>p65-LS</sup> | -368.1     | -648.8 to -87.34   | Yes              | **      | 0.0029           |
| FUN-LOV <sup>VP16</sup> vs. HAP-LOV <sup>LS</sup>     | -385.6     | -666.4 to -104.9   | Yes              | **      | 0.0016           |
| FUN-LOV <sup>p65</sup> vs. FUN-LOV <sup>LS</sup>      | -2351      | -2631 to -2070     | Yes              | ****    | <0.0001          |
| FUN-LOV <sup>p65</sup> vs. HAP-LOV                    | 212.7      | -68.07 to 493.4    | No               | ns      | 0.2749           |
| FUN-LOV <sup>p65</sup> vs. HAP-LOV <sup>VP16</sup>    | 366.6      | 85.83 to 647.3     | Yes              | **      | 0.0031           |
| FUN-LOV <sup>p65</sup> vs. HAP-LOV <sup>p65</sup>     | 15.38      | -265.4 to 296.1    | No               | ns      | >0.9999          |
| FUN-LOV <sup>p65</sup> vs. HAP-LOV <sup>p65-LS</sup>  | -149.1     | -429.8 to 131.6    | No               | ns      | 0.7254           |
| FUN-LOV <sup>p65</sup> vs. HAP-LOV <sup>LS</sup>      | -166.6     | -447.4 to 114.1    | No               | ns      | 0.5954           |
| FUN-LOV <sup>LS</sup> vs. HAP-LOV                     | 2563       | 2283 to 2844       | Yes              | ****    | <0.0001          |
| FUN-LOV <sup>LS</sup> vs. HAP-LOV <sup>VP16</sup>     | 2717       | 2436 to 2998       | Yes              | ****    | <0.0001          |
| FUN-LOV <sup>LS</sup> vs. HAP-LOV <sup>p65</sup>      | 2366       | 2085 to 2647       | Yes              | ****    | <0.0001          |
| FUN-LOV <sup>LS</sup> vs. HAP-LOV <sup>p65-LS</sup>   | 2202       | 1921 to 2482       | Yes              | ****    | <0.0001          |
| FUN-LOV <sup>LS</sup> vs. HAP-LOV <sup>LS</sup>       | 2184       | 1903 to 2465       | Yes              | ****    | <0.0001          |
| HAP-LOV vs. HAP-LOV <sup>VP16</sup>                   | 153.9      | -126.8 to 434.6    | No               | ns      | 0.6910           |
| HAP-LOV vs. HAP-LOV <sup>p65</sup>                    | -197.3     | -478.0 to 83.45    | No               | ns      | 0.3700           |

|                                                       |        |                  |     |      |         |
|-------------------------------------------------------|--------|------------------|-----|------|---------|
| HAP-LOV vs. HAP-LOV <sup>p65-LS</sup>                 | -361.8 | -642.5 to -81.03 | Yes | **   | 0.0037  |
| HAP-LOV vs. HAP-LOV <sup>LS</sup>                     | -379.3 | -660.0 to -98.56 | Yes | **   | 0.0020  |
| HAP-LOV <sup>VP16</sup> vs. HAP-LOV <sup>p65</sup>    | -351.2 | -631.9 to -70.45 | Yes | **   | 0.0053  |
| HAP-LOV <sup>VP16</sup> vs. HAP-LOV <sup>p65-LS</sup> | -515.7 | -796.4 to -234.9 | Yes | **** | <0.0001 |
| HAP-LOV <sup>VP16</sup> vs. HAP-LOV <sup>LS</sup>     | -533.2 | -813.9 to -252.5 | Yes | **** | <0.0001 |
| HAP-LOV <sup>p65</sup> vs. HAP-LOV <sup>p65-LS</sup>  | -164.5 | -445.2 to 116.3  | No  | ns   | 0.6118  |
| HAP-LOV <sup>p65</sup> vs. HAP-LOV <sup>LS</sup>      | -182.0 | -462.8 to 98.73  | No  | ns   | 0.4786  |
| HAP-LOV <sup>p65-LS</sup> vs. HAP-LOV <sup>LS</sup>   | -17.53 | -298.3 to 263.2  | No  | ns   | >0.9999 |

ns: no significance.

**Supplementary Table S4.** Yeast strains used and generated in this work.

| Strain                      | Genotype*                                | Source    |
|-----------------------------|------------------------------------------|-----------|
| BY4741                      | <i>MATa his3Δ1 leu2Δ0 met15Δ0 ura3Δ0</i> | Euroscarf |
| <i>hap1Δ</i>                | BY4741; <i>hap1Δ::KanMx</i>              | This work |
| <i>cha4Δ</i>                | BY4741; <i>cha4Δ::KanMx</i>              | This work |
| <i>P<sub>GAL1</sub>-Luc</i> | BY4741; plasmid 3                        | [8]       |
| FUN-LOV                     | BY4741; plasmids 1, 2, and 3             | [8]       |
| FUN-LOV <sup>VP16</sup>     | BY4741; plasmids 1, 3, and 23            | This work |
| FUN-LOV <sup>p65</sup>      | BY4741; plasmids 1, 3, and 22            | This work |
| FUN-LOV <sup>HS</sup>       | BY4741; plasmids 3, 26, and 27           | This work |
| FUN-LOV <sup>LS</sup>       | BY4741; plasmids 3, 28, and 29           | This work |
| FUN-LOV <sup>LW</sup>       | BY4741; plasmids 3, 24, and 25           | This work |
| <i>P<sub>CYC1</sub>-Luc</i> | BY4741; plasmid 6                        | This work |
| <i>P<sub>CYC1</sub>-Luc</i> | <i>hap1Δ</i> ; plasmid 6                 | This work |
| <i>P<sub>CHA1</sub>-Luc</i> | <i>cha4Δ</i> ; plasmid 10                | This work |
| <i>CHA-LOV</i>              | <i>cha4Δ</i> ; plasmids 2, 10, and 11    | This work |
| HAP-LOV                     | <i>hap1Δ</i> ; plasmids 2, 6, and 7      | This work |
| HAP-LOV <sup>VP16</sup>     | <i>hap1Δ</i> ; plasmids 6, 7, and 23     | This work |
| HAP-LOV <sup>p65</sup>      | <i>hap1Δ</i> ; plasmids 6, 7, and 22     | This work |
| HAP-LOV <sup>LS</sup>       | <i>hap1Δ</i> ; plasmids 6, 25, and 30    | This work |
| HAP-LOV <sup>p65-LS</sup>   | <i>hap1Δ</i> ; plasmids 6, 30, and 33    | This work |
| <i>P<sub>ARO9</sub>-Luc</i> | BY4741; plasmid 4                        | This work |
| Aro80p DBD                  | BY4741; plasmids 2, 4, and 5             | This work |
| <i>P<sub>LYS9</sub>-Luc</i> | BY4741; plasmid 8                        | This work |
| Lys14p DBD                  | BY4741; plasmids 2, 8, and 9             | This work |
| <i>P<sub>CHA1</sub>-Luc</i> | BY4741; plasmid 10                       | This work |
| Cha4p DBD                   | BY4741; plasmids 2, 10, and 11           | This work |
| <i>P<sub>THI6</sub>-Luc</i> | BY4741; plasmid 12                       | This work |
| Thi2p DBD                   | BY4741; plasmids 2, 12, and 13           | This work |
| <i>P<sub>ERG2</sub>-Luc</i> | BY4741; plasmid 12                       | This work |
| Ecm22p DBD                  | BY4741; plasmids 2, 14, and 15           | This work |
| <i>P<sub>ICL1</sub>-Luc</i> | BY4741; plasmid 16                       | This work |
| Cat8p DBD                   | BY4741; plasmids 2, 16, and 17           | This work |
| <i>P<sub>UGA1</sub>-Luc</i> | BY4741; plasmid 18                       | This work |
| Dal81p DBD                  | BY4741; plasmids 2, 18, and 19           | This work |
| <i>P<sub>URA3</sub>-Luc</i> | BY4741; plasmid 20                       | This work |
| Ppr1p DBD                   | BY4741; plasmids 2, 20, and 21           | This work |

\* plasmid information in the Supplementary Table S5.

**Supplementary Table S5.** Plasmids used and generated in this work.

| Plasmid number | Plasmid                           | Construct                                          |
|----------------|-----------------------------------|----------------------------------------------------|
| 1              | pRS423-WC-1                       | $P_{ADH1}$ -WC-1 LOV-GAL4 DBD-ADH2 <sub>ter</sub>  |
| 2              | pRS425-VVD                        | $P_{ADH1}$ -VVD-GAL4 AD-ADH2 <sub>ter</sub>        |
| 3              | pRS426- $P_{GAL1}$ -Luc           | KanMxRV- $P_{GAL1}$ -Luc-CYC1 <sub>ter</sub>       |
| 4              | pRS426- $P_{ARO9}$ -Luc           | $P_{ARO9}$ -Luc-CYC1 <sub>ter</sub>                |
| 5              | pRS423-WC-1-ARO80 DBD             | $P_{ADH1}$ -WC-1 LOV-ARO80 DBD-ADH2 <sub>ter</sub> |
| 6              | pRS426- $P_{CYC1}$ -Luc           | $P_{CYC1}$ -Luc-CYC <sub>ter</sub>                 |
| 7              | pRS423-WC-1-HAP1 DBD              | $P_{ADH1}$ -WC-1 LOV -HAP1 DBD-ADH2 <sub>ter</sub> |
| 8              | pRS426- $P_{LYS9}$ -Luc           | $P_{LYS9}$ -Luc-CYC <sub>ter</sub>                 |
| 9              | pRS423-WC-1-LYS14 DBD             | $P_{ADH1}$ -WC-1 LOV-LYS14 DBD-ADH2 <sub>ter</sub> |
| 10             | pRS426- $P_{CHA1}$ -Luc           | $P_{CHA1}$ -Luc-CYC <sub>ter</sub>                 |
| 11             | pRS423- $P_{ADH1}$ -WC-1-CHA4 DBD | $P_{ADH1}$ -WC-1 LOV-CHA4 DBD-ADH2 <sub>ter</sub>  |
| 12             | pRS426- $P_{THI6}$ -Luc           | $P_{THI6}$ -Luc-CYC <sub>ter</sub>                 |
| 13             | pRS423-WC-1-THI2 DBD              | $P_{ADH1}$ -WC-1 LOV-THI2 DBD-ADH2 <sub>ter</sub>  |
| 14             | pRS426- $P_{ERG2}$ -Luc           | $P_{ERG2}$ -Luc-CYC1 <sub>ter</sub>                |
| 15             | pRS423-WC-1-ECM22 DBD             | $P_{ADH1}$ -WC-1 LOV-ECM22 DBD-ADH2 <sub>ter</sub> |
| 16             | pRS426- $P_{ICL1}$ -Luc           | $P_{ICL1}$ -Luc-CYC1 <sub>ter</sub>                |
| 17             | pRS423-WC-1-CAT8 DBD              | $P_{ADH1}$ -WC-1 LOV-CAT8 DBD-ADH2 <sub>ter</sub>  |
| 18             | pRS426- $P_{UGA1}$ -Luc           | $P_{UGA1}$ -Luc-CYC1 <sub>ter</sub>                |
| 19             | pRS423-WC-1-DAL81 DBD             | $P_{ADH1}$ -WC-1 LOV-DAL81 DBD-ADH2 <sub>ter</sub> |
| 20             | pRS426- $P_{URA3}$ -Luc           | $P_{URA3}$ -Luc-CYC1 <sub>ter</sub>                |
| 21             | pRS423-WC-1-PPR1 DBD              | $P_{ADH1}$ -WC-1 LOV-PPR1 DBD-ADH2 <sub>ter</sub>  |
| 22             | pRS425-VVD-p65                    | $P_{ADH1}$ -VVD-SV40-P65-ADH2 <sub>ter</sub>       |
| 23             | pRS425-VVD-VP16                   | $P_{ADH1}$ -VVD-SV40-VP16-ADH2 <sub>ter</sub>      |
| 24             | pRS313-WC-1 (W)                   | $P_{ADH1}$ -WC-1 LOV-GAL4 DBD-ADH2 <sub>ter</sub>  |
| 25             | pRS315-VVD (W)                    | $P_{ADH1}$ -VVD-GAL4 AD-ADH2 <sub>ter</sub>        |
| 26             | pRS423-WC-1 (S)                   | $P_{TDH3}$ -WC-1 LOV-GAL4 DBD-ADH2 <sub>ter</sub>  |
| 27             | pRS425-VVD (S)                    | $P_{TDH3}$ -VVD-GAL4 AD-ADH2 <sub>ter</sub>        |
| 28             | pRS313-WC-1 (S)                   | $P_{TDH3}$ -WC-1 LOV-GAL4 DBD-ADH2 <sub>ter</sub>  |
| 29             | pRS315-VVD (S)                    | $P_{TDH3}$ -VVD-GAL4 AD-ADH2 <sub>ter</sub>        |
| 30             | pRS313-WC-1-HAP1 DBD (W)          | $P_{ADH1}$ -WC-1 LOV-HAP1 DBD-ADH2 <sub>ter</sub>  |
| 31             | pRS423-WC-1-HAP1-DBD (S)          | $P_{TDH3}$ -WC-1 LOV-HAP1 DBD-ADH2 <sub>ter</sub>  |
| 32             | pRS313-WC-1-HAP1-DBD (S)          | $P_{TDH3}$ -WC-1 LOV-HAP1 DBD -ADH2 <sub>ter</sub> |
| 33             | pRS315-VVD-p65 (S)                | $P_{TDH3}$ -VVD-p65-ADH2 <sub>ter</sub>            |

(W): weak promoter; (S): strong promoter

**Supplementary Table S6.** Primers used in this work.

| Name   | Orientation | Length (nt) | Sequence (5' - 3')                                     | Description                                                                            |
|--------|-------------|-------------|--------------------------------------------------------|----------------------------------------------------------------------------------------|
| oL3758 | Fw          | 50          | agcggataacaatttcacacaggaacagcTAGGCGCATGCAAC<br>TTCTTT  | Recombination of <i>P<sub>ADH1</sub></i> with<br>pRS313, pRS315, pRS423<br>or pRS425   |
| oL3148 | Rv          | 50          | GGTAACGCCAGGGTTTTCCAGTCACGACGCCGGT<br>AGAGGTGTGGTCAAT  | Recombination of <i>ADH2<sub>ter</sub></i><br>with pRS313, pRS315,<br>pRS423 or pRS425 |
| oL3084 | Fw          | 50          | AGCGGATAACAATTTACACAGGAAACAGCATCGAT<br>GAATTCGAGCTCGT  | Recombination of <i>KanMx</i><br>with pRS426                                           |
| oL3070 | Fw          | 50          | CGACTCACTATAGGGAATATTAAGCTTACCATGGCC<br>GATGCTAAGAACAT | Recombination of <i>P<sub>GAL1</sub></i> with<br><i>Luc</i>                            |
| oL2833 | Rv          | 50          | GCCCTTCTTAATGTTCTTAGCATCGGCCATGGTAAG<br>CTTAATATTCCTA  | Recombination of <i>P<sub>GAL1</sub></i> with<br><i>Luc</i>                            |
| pL599  | Fw          | 50          | gtaacgccagggtttccagtcacgacgtgggaagtcataatagat          | Recombination of pRS426<br>with <i>P<sub>ARO9</sub></i>                                |
| pL598  | Fw          | 50          | ataccacaattacactctctcatcgactcaatggccgatgctaagaacat     | Recombination of <i>P<sub>ARO9</sub></i> with<br><i>LUC</i>                            |
| pL600  | Rv          | 50          | gcccttctaattgttcttagcatcgccattgagtcgatgagagagtga       | Recombination of <i>P<sub>ARO9</sub></i> with<br><i>Luc</i>                            |
| pL597  | Rv          | 50          | gcggataacaatttcacacaggaacagcttgatccttgcaaattaaag       | Recombination of <i>CYC1<sub>ter</sub></i><br>with pRS426                              |
| pL546  | Fw          | 50          | atgcaggtcaactataccacagcggtccatgtctgctaagaaaaggcc       | Recombination of <i>WC-1</i> with<br><i>ARO80 DBD</i>                                  |
| pL545  | Rv          | 50          | gttcccgaaggcctttcttagcacagatggtccgctgtgggtatagt        | Recombination of <i>WC-1</i> with<br><i>ARO80 DBD</i>                                  |
| pL548  | Fw          | 50          | ggaactgtagcaaaagaaggcgcaaaagaattgtaatacgactcactat      | Recombination of <i>ARO80<br/>DBD ADH2<sub>ter</sub></i>                               |
| pL547  | Rv          | 50          | ggctcgccctatagttagtcgtattcaaatctttgcgccctcttttg        | Recombination of <i>ARO80<br/>DBD</i> with <i>ADH2<sub>ter</sub></i>                   |
| pL544  | Rv          | 50          | ggtaacgccagggtttccagtcacgacggccgtagaggtgtggtcaa        | Recombination of <i>ADH2<sub>ter</sub></i><br>with <i>LacZ</i>                         |
| pL605  | Fw          | 50          | gtaacgccagggtttccagtcacgacgtgtttagtgtgtaagaata         | Recombination of pRS426<br>with <i>P<sub>CYC1</sub></i>                                |
| pL604  | Fw          | 50          | acaaacacaaatacacacactaaataataatggccgatgctaagaacat      | Recombination of <i>P<sub>CYC1</sub></i> with<br><i>Luc</i>                            |
| pL606  | Rv          | 50          | gcccttctaattgttcttagcatcgccattataattagtgtgtgat         | Recombination of <i>P<sub>CYC1</sub></i> with<br><i>Luc</i>                            |
| pL566  | Fw          | 50          | caggtaactatacccacagcggtccatgagctctaactccaccctt         | Recombination of <i>WC-1</i> with<br><i>HAP1 DBD</i>                                   |
| pL565  | Rv          | 50          | catgtgcaagggtggagagtagagctcatggatccgctgtgggtatagt      | Recombination of <i>WC-1</i> with<br><i>HAP1 DBD</i>                                   |
| pL568  | Fw          | 50          | caacaacagcaacagcagcaacagggaacaattgtaatacgactcactat     | Recombination of <i>HAP1<br/>DBD ADH2<sub>ter</sub></i>                                |
| pL567  | Rv          | 50          | ggctcgccctatagttagtcgtattcaaatgttctgtgtgctgtt          | Recombination of <i>HAP1<br/>DBD ADH2<sub>ter</sub></i>                                |
| pL614  | Fw          | 50          | gtaacgccagggtttccagtcacgacgtccatgatattgtaactaa         | Recombination of pRS426<br>with <i>P<sub>LYS9</sub></i>                                |
| pL613  | Fw          | 50          | gagttatattaacgtattatataatttaataatggccgatgctaagaacat    | Recombination of <i>P<sub>LYS9</sub></i> with<br><i>Luc</i>                            |
| pL615  | Rv          | 50          | gcccttctaattgttcttagcatcgccattataaaatataataacgtt       | Recombination of <i>P<sub>LYS9</sub></i> with<br><i>Luc</i>                            |
| pL570  | Fw          | 50          | caggtaactatacccacagcggtccatgaccctaatacctgctgtaac       | Recombination of <i>WC-1</i> with<br><i>LYS14 DBD</i>                                  |
| pL569  | Rv          | 50          | agttgaagttacagcaggattaggggtcatggatccgctgtgggtatagt     | Recombination of <i>WC-1</i> with<br><i>LYS14 DBD</i>                                  |
| pL572  | Fw          | 50          | gacctaccaccacaatgaatggatagactttgtaatacgactcactat       | Recombination of <i>LYS14<br/>DBD ADH2<sub>ter</sub></i>                               |
| pL571  | Rv          | 50          | ggctcgccctatagttagtcgtattcaaatgcatatccattcattgtgg      | Recombination of <i>LYS14<br/>DBD</i> with <i>ADH2<sub>ter</sub></i>                   |
| pL602  | Fw          | 50          | gtaacgccagggtttccagtcacgacgttaatcgatgtgtcctgttt        | Recombination of pRS426<br>with <i>P<sub>CHA1</sub></i>                                |
| pL601  | Fw          | 50          | agacaagagacaggaaaattaaccagcgagatggccgatgctaagaac<br>at | Recombination of <i>P<sub>CHA1</sub></i> with<br><i>Luc</i>                            |
| pL603  | Rv          | 50          | gcccttctaattgttcttagcatcgccatctcgtgtgtaattttcctg       | Recombination of <i>P<sub>CHA1</sub></i> with<br><i>Luc</i>                            |

|        |    |    |                                                                         |                                                                  |
|--------|----|----|-------------------------------------------------------------------------|------------------------------------------------------------------|
| pL554  | Fw | 50 | caggtaactataccacagcgatccatgcttcggtccagtttaagaa                          | Recombination of <i>WC-1</i> with <i>CHA4 DBD</i>                |
| pL553  | Rv | 50 | cacagatttcttaactggacggaagcatggatccgctgtgggtatagt                        | Recombination of <i>WC-1</i> with <i>CHA4 DBD</i>                |
| pL556  | Fw | 50 | ttaccaagaaaatgcctccgagagccctttgtaatacagactcactat                        | Recombination of <i>CHA4 DBD</i> with <i>ADH2<sub>ter</sub></i>  |
| pL555  | Rv | 50 | ggctcgccctatagtgagtcgtattacaaaagggtctcggaaggcattt                       | Recombination of <i>CHA4 DBD</i> with <i>ADH2<sub>ter</sub></i>  |
| pL620  | Fw | 50 | gtaacgccagggtttccagtcacgacgtattgcttataaaaactgat                         | Recombination of pRS426 with <i>P<sub>THI6</sub></i>             |
| pL619  | Fw | 50 | aagctaaattatttaatacaaacagcggaatggccgatgctaagaacat                       | Recombination of <i>P<sub>THI6</sub></i> with <i>Luc</i>         |
| pL621  | Rv | 50 | gcccttctaattgttcttagcatcgccatttccgctgtttgattaaat                        | Recombination of <i>P<sub>THI6</sub></i> with <i>Luc</i>         |
| pL586  | Fw | 50 | atgcaggtaactataccacagcgatccatggtaataagaggga                             | Recombination of <i>WC-1</i> with <i>THI2 DBD</i>                |
| pL585  | Rv | 50 | gcttctgctgctcttactattgacatggatccgctgtgggtatagt                          | Recombination of <i>WC-1</i> with <i>THI2 DBD</i>                |
| pL588  | Fw | 50 | cggagattgaagatatacaataacgctgtgttgtaatacagactcactat                      | Recombination of <i>THI2 DBD</i> with <i>ADH2<sub>ter</sub></i>  |
| pL587  | Rv | 50 | ggctcgccctatagtgagtcgtattacaaacacagcgtattgtatatct                       | Recombination of <i>THI2 DBD</i> with <i>ADH2<sub>ter</sub></i>  |
| pL608  | Fw | 50 | gtaacgccagggtttccagtcacgacgtagcgttacgttcgatcctt                         | Recombination of pRS426 with <i>P<sub>ERG2</sub></i>             |
| pL607  | Fw | 50 | aaactaagactagcccagaccattatagccatggccgatgctaagaacat                      | Recombination of <i>P<sub>ERG2</sub></i> with <i>Luc</i>         |
| pL609  | Rv | 50 | tagccagaccattatagccatggccgatgctaagaacattaagaagggc                       | Recombination of <i>P<sub>ERG2</sub></i> with <i>Luc</i>         |
| pL562  | Fw | 50 | caggtaactataccacagcgatccatggaactgattgaggtggggg                          | Recombination of <i>WC-1</i> with <i>ECM22 DBD</i>               |
| pL561  | Rv | 50 | ttcttgccccaacctcaatcagttccatggatccgctgtgggtatagt                        | Recombination of <i>WC-1</i> with <i>ECM22 DBD</i>               |
| pL564  | Fw | 50 | tccaataataggagaatctttgtaccgtttgtaatacagactcactat                        | Recombination of <i>ECM22 DBD</i> with <i>ADH2<sub>ter</sub></i> |
| pL563  | Rv | 50 | ggctcgccctatagtgagtcgtattacaaacggtaacaaaagatttcca                       | Recombination of <i>ECM22 DBD</i> with <i>ADH2<sub>ter</sub></i> |
| pL611  | Fw | 50 | gtaacgccagggtttccagtcacgacgtatatccatcacctacgtcgc                        | Recombination of pRS426 with <i>P<sub>ICL1</sub></i>             |
| pL610  | Fw | 50 | tagcataacataacaaaaagtaacgaaaaatggccgatgctaagaacat                       | Recombination of <i>P<sub>ICL1</sub></i> with <i>Luc</i>         |
| pL612  | Rv | 50 | gcccttctaattgttcttagcatcgccattttcgttgacttttgta                          | Recombination of <i>P<sub>ICL1</sub></i> with <i>Luc</i>         |
| pL550  | Fw | 50 | caggtaactataccacagcgatccatgccaagaacgtgaaggaagc                          | Recombination of <i>WC-1</i> with <i>CAT8 DBD</i>                |
| pL549  | Rv | 50 | gatcattgcttctcagcttcttgacatggatccgctgtgggtatagt                         | Recombination of <i>WC-1</i> with <i>CAT8 DBD</i>                |
| pL552  | Fw | 50 | acggtaataagcagctacaaaaatggcaatttgtaatacagactcactat                      | Recombination of <i>CAT8 DBD</i> with <i>ADH2<sub>ter</sub></i>  |
| pL551  | Rv | 50 | ggctcgccctatagtgagtcgtattacaaattgccattttgtagctgct                       | Recombination of <i>CAT8 DBD</i> with <i>ADH2<sub>ter</sub></i>  |
| pL623  | Fw | 50 | gtaacgccagggtttccagtcacgacgtattgctaactgctcgcatg                         | Recombination of pRS426 with <i>P<sub>UGA1</sub></i>             |
| pL622  | Fw | 50 | aaccgtcaataagaaatataactaagaacaatggccgatgctaagaacat                      | Recombination of <i>P<sub>UGA1</sub></i> with <i>Luc</i>         |
| pL625  | Rv | 50 | gcccttctaattgttcttagcatcgccattgttcttagtatatttctt                        | Recombination of <i>P<sub>UGA1</sub></i> with <i>Luc</i>         |
| pL558  | Fw | 50 | caggtaactataccacagcgatccatggcagatcataatggcagtaa                         | Recombination of <i>WC-1</i> with <i>DAL81 DBD</i>               |
| pL587  | Rv | 50 | gttgctattactgccattatgatctgcatggatccgctgtgggtatagt                       | Recombination of <i>WC-1</i> with <i>DAL81 DBD</i>               |
| pL560  | Fw | 50 | ctagataatgttgacaaatacagctatcatttgtaatacagactcactat                      | Recombination of <i>DAL81 DBD</i> with <i>ADH2<sub>ter</sub></i> |
| pL559  | Rv | 50 | ggctcgccctatagtgagtcgtattacaaatgatagctgtatttggtcaa                      | Recombination of <i>DAL81 DBD</i> with <i>ADH2<sub>ter</sub></i> |
| oL5101 | Fw | 72 | cggtgtaaacgacggccagtgagcgcggtttcaattcatcatTTTTTTTattct<br>TTTTTTgatttcg | Recombination of <i>P<sub>URA1</sub></i> with pRS426             |
| oL5038 | Rv | 53 | GCCCTTCTTAATGTTCTTAGCATCGGCCATgatttatctc<br>gttctcgcagg                 | Recombination of <i>P<sub>URA1</sub></i> with <i>Luc</i>         |

|        |    |    |                                                                            |                                                                     |
|--------|----|----|----------------------------------------------------------------------------|---------------------------------------------------------------------|
| oL1720 | Fw | 20 | ATGCGCCGATGCTAAGAACAT                                                      | Amplification of <i>Luc</i>                                         |
| oL5037 | Rv | 54 | gcaattaaccctcactaaaggaacaaaagctgggtgatccttgcaaatta<br>aag                  | Recombination of <i>CYC1<sub>ter</sub></i><br>with pRS426           |
| oL5031 | Fw | 53 | ccatgcaggtaactataccacagcggtatccATCTAGAACTGCA<br>TGTAACG                    | Recombination of <i>WC-1</i> with<br><i>PPR1 DBD</i>                |
| oL3599 | Rv | 21 | gctgtgggtatagttgacctg                                                      | Amplification of <i>WC-1</i>                                        |
| oL4261 | Fw | 22 | TTTGTAAATACGACTCACTATAG                                                    | Amplification of <i>ADH2<sub>ter</sub></i>                          |
| oL5032 | Rv | 50 | GCTCGCCCTATAGTGAGTCGTATTACAAAGAACTG<br>AACTGTACTTTTTTC                     | Recombination of <i>PPR1<br/>DBD</i> with <i>ADH2<sub>ter</sub></i> |
| oL5269 | Fw | 50 | CCCGAGCCTCCAAAAAGAAGAGAAAGGTCCCaccca<br>ggctggggaagg                       | Recombination <i>VVD_SV40</i><br>with <i>p65 AD</i>                 |
| oL5268 | Rv | 20 | ggcggtagcccaattcGACCT                                                      | Amplification of <i>VVD_SV40</i>                                    |
| oL4570 | Fw | 23 | ATCTTTAATACGACTCACTATAG                                                    | Amplification of <i>ADH2<sub>ter</sub></i>                          |
| oL5270 | Rv | 50 | GCTCGCCCTATAGTGAGTCGTATTAAAGATggagctgat<br>ctgactcagca                     | Recombination of <i>p65 AD</i><br>with <i>ADH2<sub>ter</sub></i>    |
| oL5352 | Fw | 50 | AAGAAGAGAAAGGTCgaattgggtaccgcccccccgaccga<br>tgtcag                        | Recombination <i>VVD_SV40</i><br>with <i>VP16 AD</i>                |
| oL4569 | Rv | 50 | GCTCGCCCTATAGTGAGTCGTATTAAAGATTTAcccac<br>cgtactcgtcaattc                  | Recombination of <i>VP16 AD</i><br>with <i>ADH2<sub>ter</sub></i>   |
| oL4568 | Fw | 50 | ATGGGTTTCCAGTGCGAAACGGAaggatccgcccccccgga<br>ccgatgtcag                    | Recombination <i>VVD</i> with<br><i>VP16 AD</i>                     |
| oL3150 | Fw | 50 | agcggataacaatttcacacaggaacagcATTTCAAAGAATAC<br>GTAAAT                      | Recombination <i>P<sub>TDH3</sub></i> with<br>pRS423 or pRS425      |
| oL5379 | Fw | 50 | ATAAACAAACAAATATCTCATATAcatatgAAGAGCATT<br>TACTCCAAAAG                     | Recombination of <i>P<sub>TDH3</sub></i> with<br><i>WC-1</i>        |
| oL5378 | Rv | 50 | AGTAAATGCTCTTcatatgTATATGAGATATTTGTTTGT<br>TATGTGTGTT                      | Recombination of <i>P<sub>TDH3</sub></i> with<br><i>WC-1</i>        |
| oL5381 | Fw | 50 | ATAAACAAACAAATATCTCATATAcatatgATGAGCCAT<br>ACCGTGAACCTC                    | Recombination of <i>P<sub>TDH3</sub></i> with<br><i>VVD</i>         |
| oL5380 | Rv | 50 | CGGTATGGCTCATcatatgTATATGAGATATTTGTTTGT<br>TTATGTGTGTT                     | Recombination of <i>P<sub>TDH3</sub></i> with<br><i>VVD</i>         |
| oL5519 | Fw | 70 | GTAAGGAAATAGAAGAAAAAGAAAAAAAAAAAAAGG<br>GAACAATAGGTTAGCGGGTTAATTAAGGCGCGCC | <i>hap1</i> deletion with <i>KanMX</i>                              |
| oL5520 | Rv | 70 | TCCTATTACATTATCAATCCTTGCGTTTCAGCTTCCA<br>CTAATTTAGATGAATCGATGAATTCGAGCTCGT | <i>hap1</i> deletion with <i>KanMX</i>                              |
| oL5521 | Fw | 20 | CTCAAGATACCGCAAGCACA                                                       | External primer to confirm<br><i>hap1</i> deletion                  |
| oL5522 | Rv | 20 | GGCGCTACCATGAGAAATGT                                                       | External primer to confirm<br><i>hap1</i> deletion                  |
| oL5587 | Fw | 70 | GTTTTCAAAAATAGCCCTTTTAAACTCGAAGCTCTA<br>CACAATCGCAGCAcgggtaattaaggcgcgcc   | <i>cha4</i> deletion with <i>KanMX</i>                              |
| oL5588 | Rv | 70 | acgagctcgaattcatcgatTCTTGAGTGAAGAGATATGTT<br>ACTTGAACAAATATTCTTTATGTAAT    | <i>cha4</i> deletion with <i>KanMX</i>                              |
| oL5589 | Fw | 21 | CAATATGGAAGAACACGCATA                                                      | External primer to confirm<br><i>cha4</i> deletion                  |
| oL5590 | Rv | 20 | ATGAAAAGGACCCTAGGGCT                                                       | External primer to confirm<br><i>cha4</i> deletion                  |
| oL2090 | Rv | 21 | ttcagaaacaactctggcgca                                                      | Internal primer for <i>KanMx</i>                                    |
| oL2091 | Fw | 21 | catcctatggaactgcctcgg                                                      | Internal primer for <i>KanMx</i>                                    |
